# Supplementary material
Source: PubMed Central journal article supplement (PMC2898447)
Supplement: supp_M110.141010_supplementatry_table_s1.pdf [file supp_M110.141010_supplementatry_table_s1.pdf]

Supplementary Table S1. Selectivity Profile

|       | enzymatic IC50 (nM) |         |         |         |         |
|-------|---------------------|---------|---------|---------|---------|
|       | RO3306              | MLN8054 | ZM44739 | VX680   | BI2536  |
| Aur A | >20,000             | 32.2    | 1070    | 41.7    | >20,000 |
| Aur B | >20,000             | 18.7    | 197     | 18.1    | >20,000 |
| Cdk1  | 51.5                | >20,000 | >20,000 | >20,000 | >20,000 |
| Plk1  | >20,000             | >20,000 |         | >20,000 | 14      |
| PKCb  | 15,000              | >20,000 | >20,000 | >20,000 | >20,000 |

|               | cell based IC50 (nM) |         |         |       |         |
|---------------|----------------------|---------|---------|-------|---------|
|               | RO3306               | MLN8054 | ZM44739 | VX680 | BI2536  |
| pAur A (T288) |                      | 34.7    | 1960    | 38    |         |
| pHH3 (S10)    | >5,000               | 837     | 1340    | 73.6  | >40,000 |
| pHH1 (T154)   | 559                  | 5,720   |         | 113   | >40,000 |
| pTCTP (S46)   |                      |         |         |       | 25.9    |
